# Supplementary material
Source: publisher figshare collection journal article supplement (https://acs.figshare.com/ndownloader/files/8988394)
Supplement: Supplementary file 1 [file 8988394]

# Tunable, Liquid Resistant Tip Enhanced Raman Spectroscopy Probes: Towards Label-Free Nano-Resolved Imaging of Biological Systems

Jacob D. Scherger and Mark D. Foster\*

*Dept. of Polymer Science, The University of Akron, Akron, OH*

*\* Correspondence to: Mark D. Foster, e-mail: [mfoster@uakron.edu](mailto:mfoster@uakron.edu)*

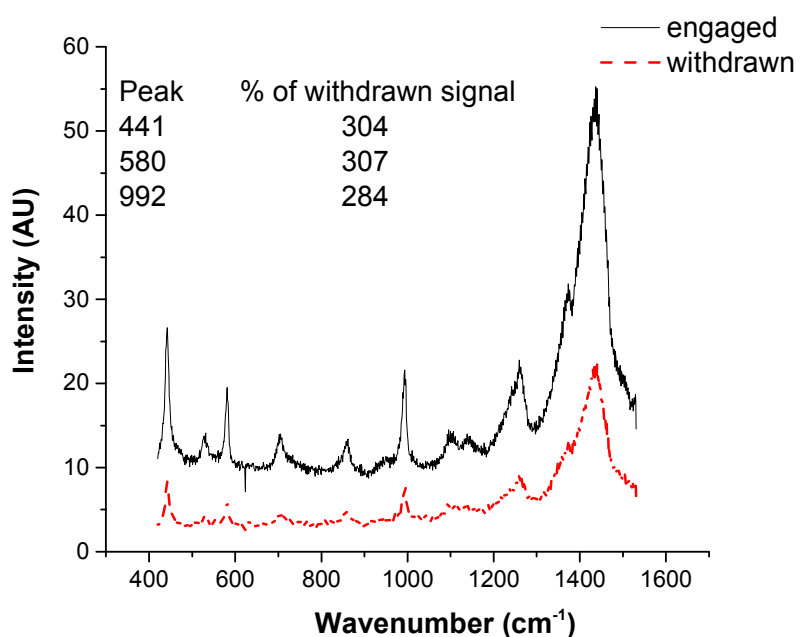

**Figure S1.** Raman spectra of PEDOT:PSS measured with a protected TiN<sub>x</sub> tip in ambient conditions. Spectra acquired with a 60 second acquisition time and an incident power of 0.9 mW with the tip engaged (solid) and withdrawn (dashed) from the surface.

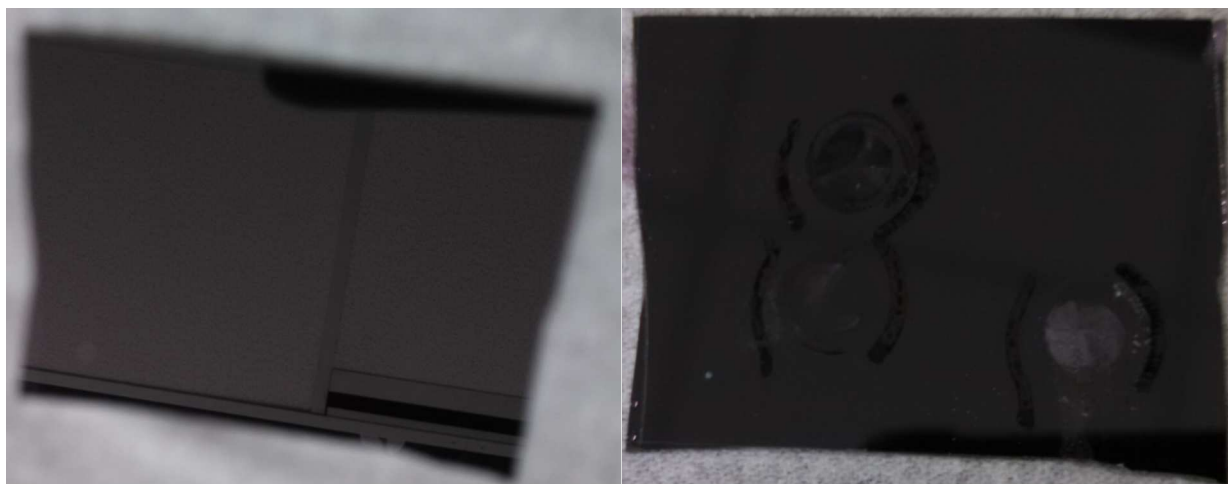

**Figure S2.** Optical images of the silicon wafer coated with 40nm of  $\text{TiN}_x$  and  $\sim 2.5\text{nm}$  of  $\text{Al}_2\text{O}_3$  before (left) and after (right) two hours of exposure to aqueous solutions. The exposed areas are bracketed off from the unexposed areas with markings made with a permanent marker, and starting from the top position and moving clockwise were exposed to 1) DMEM phosphate buffer solution 2) 5% NaCl solution and 3) spectrophotometric grade purified water.

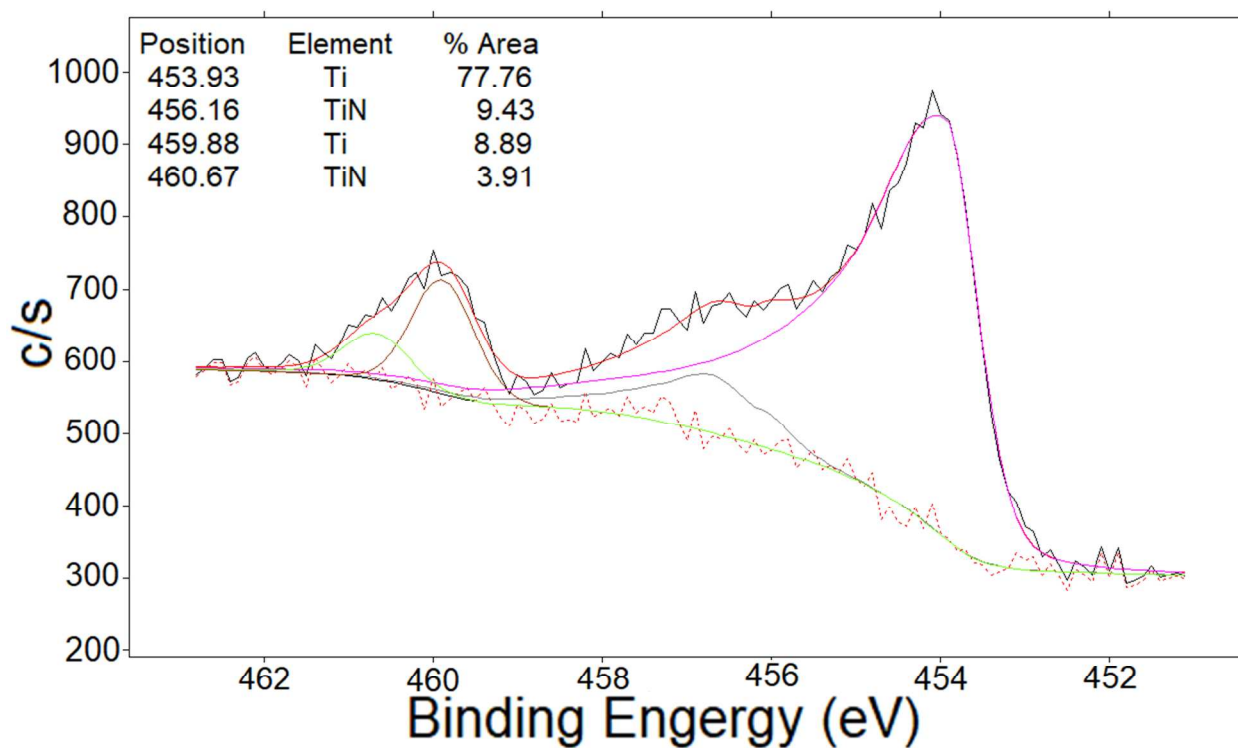

**Figure S3.** XPS high resolution scan (continuous black curve) and the best fit (continuous red curve) of the Ti2p doublet for the protected TiN<sub>x</sub> film deposited with 0% N<sub>2</sub> in the sputtering plasma. The component peaks corresponding to the species and binding energies shown in the legend are displayed as pink (453.93 eV), grey (456.16 eV), brown (459.88 eV), and green (460.67 eV). The residual is shown by the red dashed curve. The value of the figure of merit,  $\chi^2$ , for this fit is 1.47.

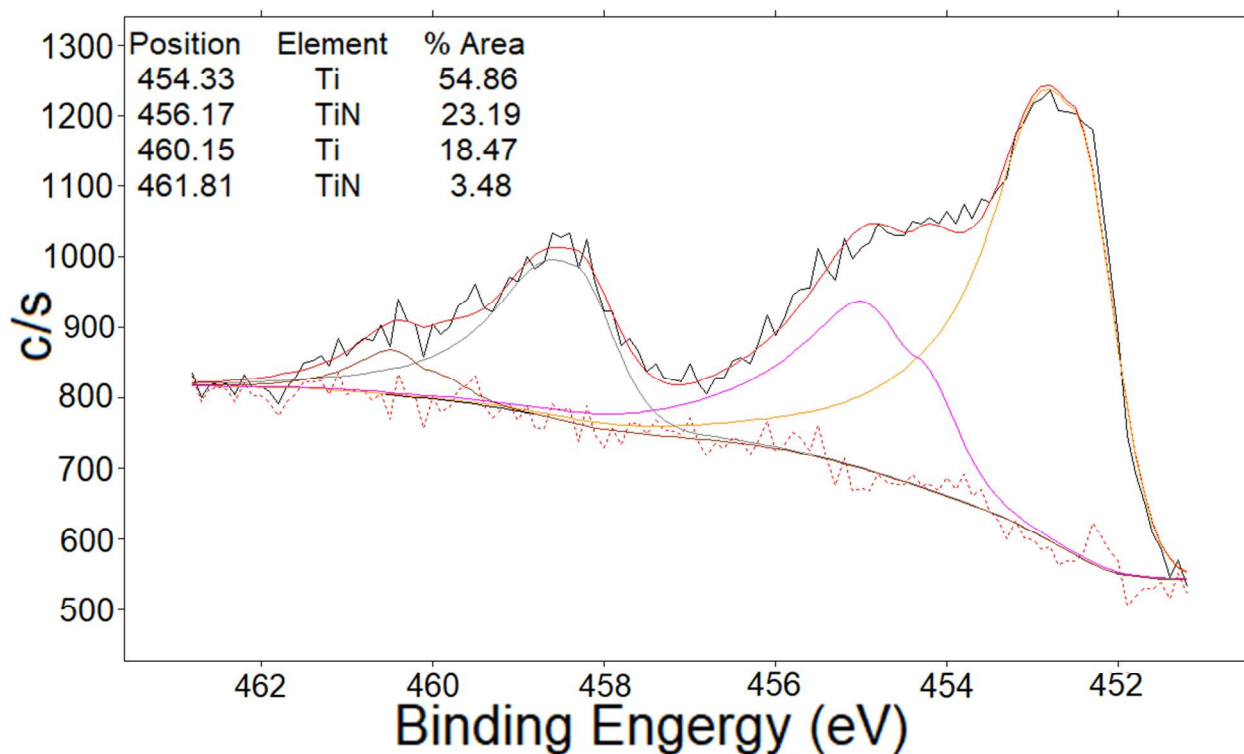

**Figure S4.** XPS high resolution scan (continuous black curve) and the best fit (continuous red curve) of the Ti2p doublet for the protected TiN<sub>x</sub> film deposited with 23% N<sub>2</sub> in the sputtering plasma. The component peaks corresponding to the species and binding energies shown in the legend are displayed as orange (454.33 eV), pink (456.17 eV), grey (460.15 eV), and brown (461.81 eV). The residual is shown by the red dashed curve. The value of the figure of merit,  $\chi^2$ , for this fit is 1.61.

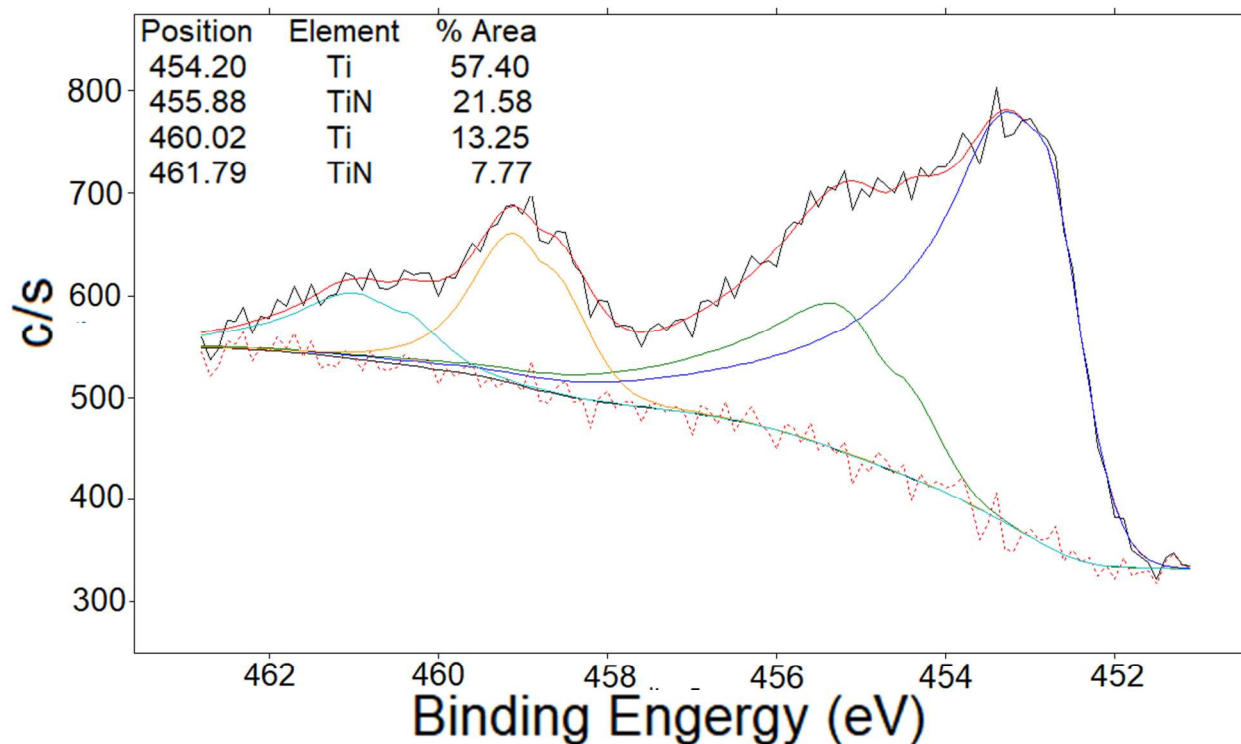

**Figure S5.** XPS high resolution scan (continuous black curve) and the best fit (continuous red curve) of the Ti2p doublet for the protected TiN<sub>x</sub> film deposited with 33% N<sub>2</sub> in the sputtering plasma. The component peaks corresponding to the species and binding energies shown in the legend are displayed as blue (454.20 eV), green (455.88 eV), orange (460.02 eV), and turquoise (461.79 eV). The residual is shown by the red dashed curve. The value of the figure of merit,  $\chi^2$ , for this fit is 0.81.

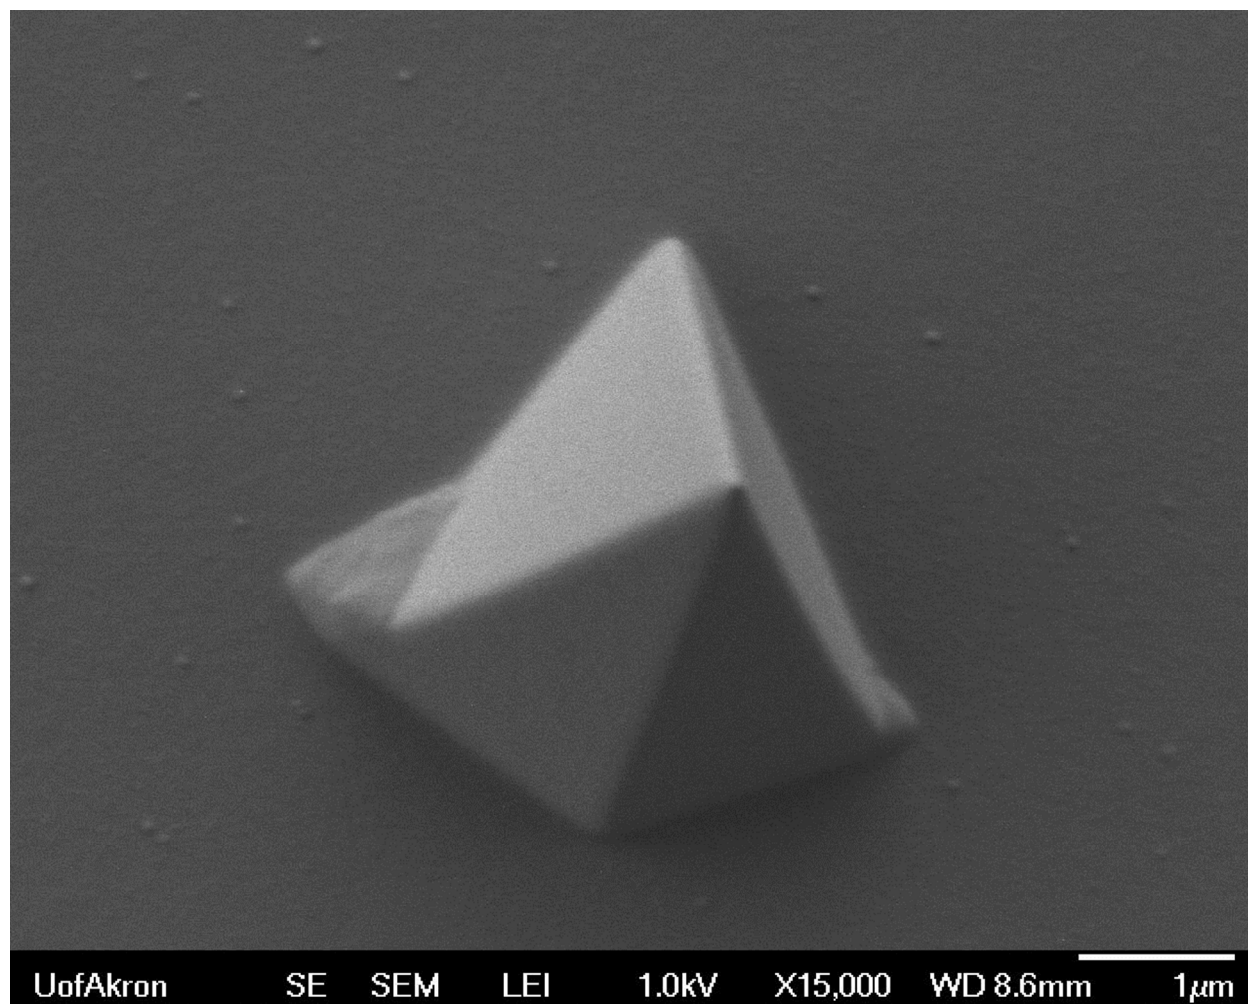

**Figure S6.** SEM image of an AFM probe with a protected  $\text{TiN}_x$  film deposited with 0%  $\text{N}_2$  in the sputtering plasma.

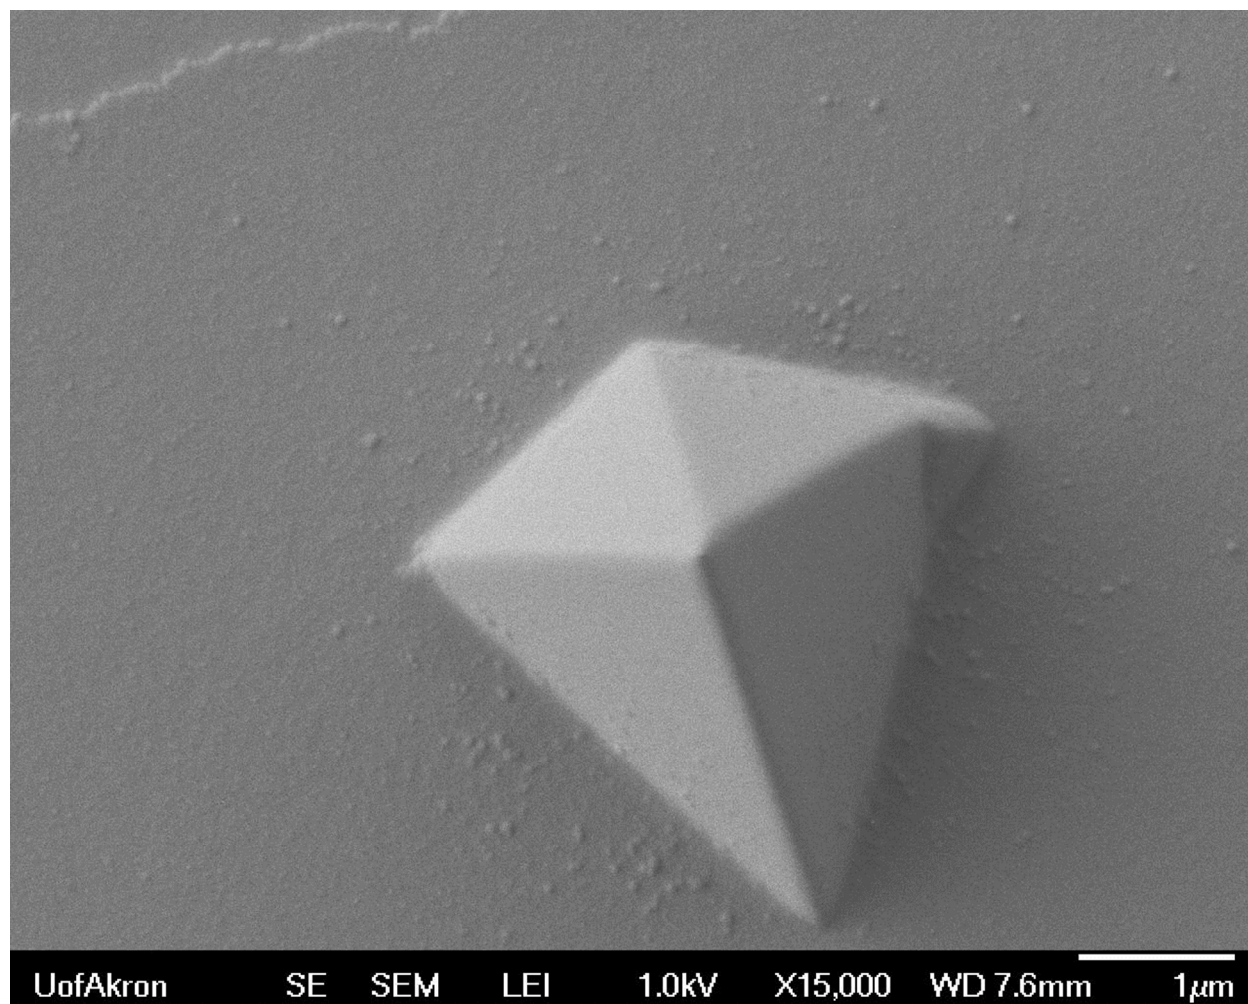

**Figure S7.** SEM image of an AFM probe with a protected  $\text{TiN}_x$  film deposited with 23%  $\text{N}_2$  in the sputtering plasma.

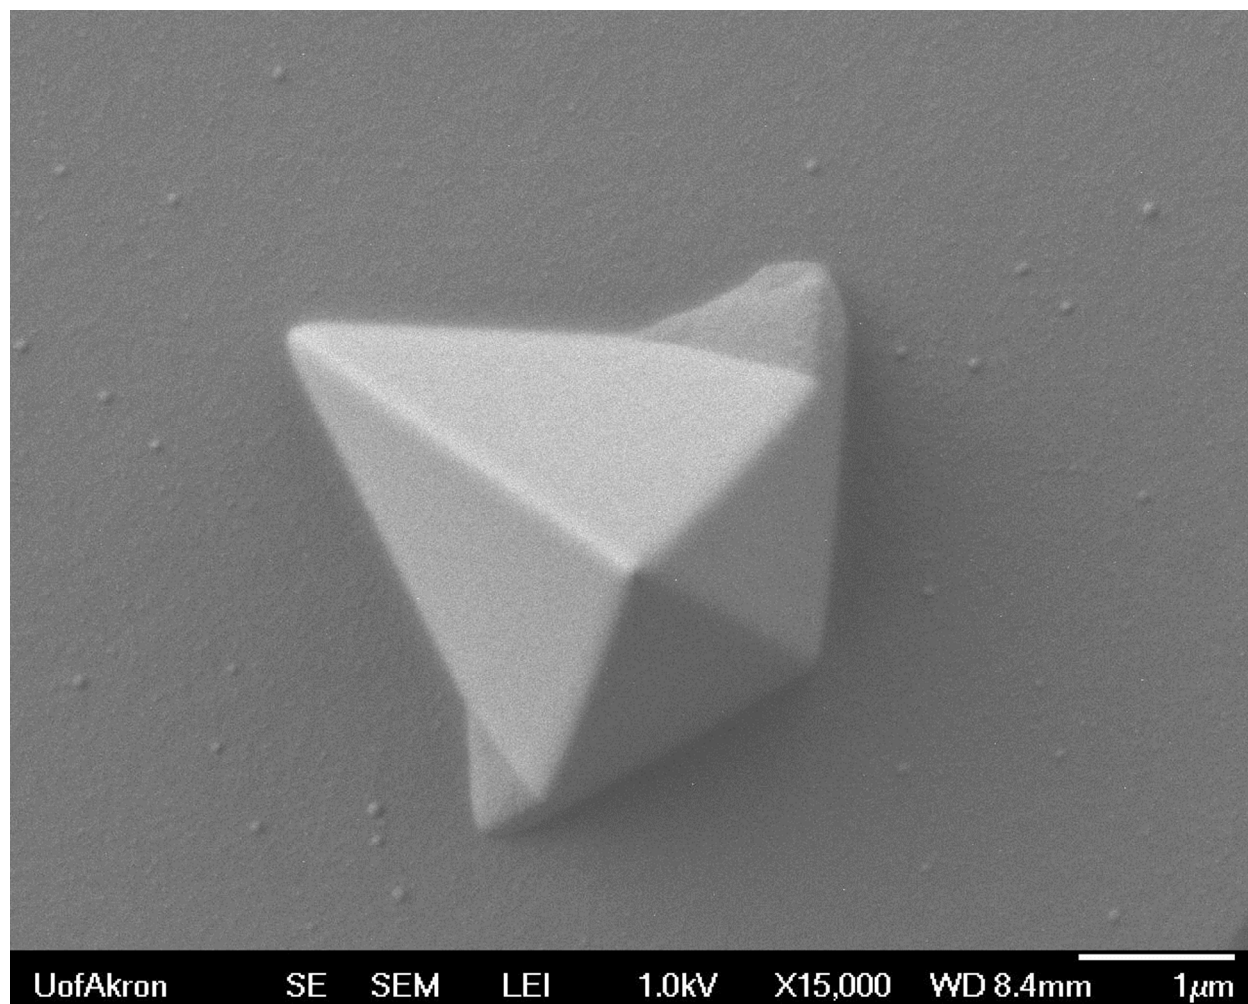

**Figure S8.** SEM image of an AFM probe with a protected  $\text{TiN}_x$  film deposited with 33%  $\text{N}_2$  in the sputtering plasma.
